# Supplementary material for: Feasibility and potential effects of breathing exercise for chronic pain management in breast cancer survivors: study protocol of a phase II randomised controlled trial
Source: HighWire-hosted journal article supplement (doi:10.1136/bmjopen-2022-064358), 2022-12-01
Supplement: bmjopen-2022-064358supp001_data_supplement.pdf [file bmjopen-2022-064358supp001_data_supplement.pdf]

**Appendix 1: The breathing exercise intervention protocol**

|                                       |                                                                                                                                                                                                                                                                                                                                                                                                                                                                                                                                                      |
|---------------------------------------|------------------------------------------------------------------------------------------------------------------------------------------------------------------------------------------------------------------------------------------------------------------------------------------------------------------------------------------------------------------------------------------------------------------------------------------------------------------------------------------------------------------------------------------------------|
| BE style                              | <p>Slow breathing</p> <ul style="list-style-type: none"><li>• Slow breathing indicates that the respiration rate is lower than a person's usual respiration rate.</li><li>• No fixed respiration rate is required as long as it can be tolerated.</li></ul>                                                                                                                                                                                                                                                                                          |
| BE techniques                         | <p>Pursed lip breathing</p> <ul style="list-style-type: none"><li>• Breathe in gently through nose while mouth is closed.</li><li>• Breathe out with lip pursed and let the air slowly release without forcing it.</li><li>• During breathing, aim at a time ratio of inspiration to expiration of 1:2-3 (count in mind 1, 2 while breathing in, and 1, 2,3, 4 (5, 6) while breathing out).</li></ul> <p>Deep breathing</p> <ul style="list-style-type: none"><li>• Breathe in until cannot breathe in anymore, then start to breathe out.</li></ul> |
| BE frequency and duration             | <ul style="list-style-type: none"><li>• BE is recommended for 5 minutes per session, 3-5 sessions a day, for 4 weeks.</li><li>• One session in the morning, midday and before bedtime; if well tolerated, an additional session can be added in each interval (between morning to midday, and between midday to bedtime).</li></ul>                                                                                                                                                                                                                  |
| BE practice condition and requirement | <ul style="list-style-type: none"><li>• Practicing BE in a comfortable and relaxed position, either lying, sitting, or standing, eyes can be closed or open.</li><li>• During practice, focus on breathing and keep mind off from any stressful or unpleasant thoughts.</li></ul>                                                                                                                                                                                                                                                                    |

**BE: Breathing exercise****Note:**

The development and validation of the breathing exercise intervention protocol has been separately reported in a methodological paper which has been submitted to a journal for peer review. Please refer to the paper titled "Development and validation of an evidence-based breathing exercise intervention protocol for chronic pain management in breast cancer survivors" for more details about the intervention development process and the supporting evidence.
